Anesthesiology

83:109-119, 1995

© 1995 American Society of Anesthesiologists, Inc.

Lippincott-Raven Publishers

## Effects of Halothane on Glutamate Receptor-mediated Excitatory Postsynaptic Currents

### A Patch-Clamp Study in Adult Mouse Hippocampal Slices

Misha Perouansky, M.D.,\* Dimitri Baranov, M.D.,† Michael Salman, M.Sc.,‡ Yoel Yaari, Ph.D.§

**Background:** The effects of halothane on excitatory synaptic transmission in the central nervous system of mammals have been studied *in vivo* and *in vitro* in several investigations with partially contradicting results. Direct measurements of the effects of halothane on isolated glutamate receptor-mediated (glutamatergic) excitatory postsynaptic currents (EPSCs), however, have not been reported to date.

**Methods:** The effects of halothane on glutamatergic EPSCs were studied *in vitro* by using tight-seal, whole-cell recordings from CA1 pyramidal cells in thin slices from the adult mouse hippocampus. The EPSCs were pharmacologically isolated into their non-N-methyl-D-aspartate (non-NMDA) and NMDA receptor-mediated components by using selective antagonists. The effects of halothane on EPSC amplitude and kinetics were analyzed at various membrane potentials and were compared with its effects on currents evoked by exogenously applied glutamatergic agonists.

**Results:** Halothane (0.2–5.1%; 0.37–2.78 mM) reversibly blocked non-NMDA and NMDA EPSCs. This effect was voltage independent; concentrations producing 50% inhibition were 0.87% (0.66 mM) and 0.69% (0.57 mM), respectively. Currents induced by bath-applied glutamatergic agonists were not affected even by the high concentrations of halothane.

**Conclusions:** Halothane depresses glutamatergic EPSCs irrespective of receptor subtype, most likely by inhibition of glutamate release. (Key words: Anesthetics, volatile: halothane. Animals: mouse. Brain: hippocampus. Central nervous system: excitatory postsynaptic currents. Central nervous system, receptors: glutamate; N-methyl-D-aspartate; non-N-methyl-D-aspartate. Measurement techniques: hippocampal slice; patch-clamp.)

GENERAL anesthetics affect synaptic transmission at concentrations likely to be found in the brain during surgical anesthesia.<sup>1</sup> This interaction may take place at multiple sites and may differ from one neurotransmitter system to another.<sup>2,3</sup> The precise sites and mechanisms of this interaction as well as their relative importance to the anesthetic state are not yet understood.

Halothane affects the inhibitory  $\gamma$ -aminobutyric acid (GABA)-mediated transmitter system at various sites. First, in cortical slices, it reduces the breakdown of GABA, thus potentially increasing its concentration in the synaptic cleft.<sup>4</sup> Second, it prolongs the time constant of decay of spontaneous, GABA<sub>A</sub> receptor-mediated postsynaptic currents in hippocampal slices through release of intracellular calcium.<sup>4</sup> These effects may contribute to the depressant effect of halothane on the central nervous system (CNS).

Several studies have investigated the effects of halothane on excitatory synaptic transmission in a variety of mammalian CNS preparations. The results of experiments conducted *in vivo* have been contradictory.<sup>5</sup> In the cat, halothane was found to facilitate excitatory synaptic transmission in the cuneate nucleus<sup>6</sup> and to depress it in the spinal cord<sup>7</sup> but in the rat hippocampus was found to leave it unaffected.<sup>8</sup> More consistent results were obtained in experiments in CNS preparations *in vitro*. Halothane depressed excitatory synaptic transmission in the guinea pig olfactory cortex<sup>9</sup> and dentate gyrus<sup>10</sup> as well as in the spinal cord of newborn rats.<sup>11</sup> Contradictory results, however, were obtained in the rabbit olfactory bulb<sup>12</sup> and in some pathways of

\* Resident Physician, Department of Anesthesiology and Critical Care, Hadassah University Hospital—Hebrew University.

† Attending Physician, Department of Anesthesiology and Critical Care, Hadassah University Hospital—Hebrew University.

‡ Graduate Student, Department of Membrane and Ultrastructure Research, Hebrew University School of Medicine.

§ Associate Professor of Physiology, Hebrew University School of Medicine.

Received from the Department of Anesthesiology and Critical Care, Hadassah University Hospital—Hebrew University, and the Department of Physiology, Hebrew University School of Medicine, Jerusalem, Israel. Submitted for publication August 30, 1994. Accepted for publication March 13, 1995. Supported in part by the German Israeli Foundation for Scientific Research and Development, by the Bernard Katz Minerva Center in Cell Biophysics (Dr. Yaari), and by a Foulkes Fellowship (Dr. Perouansky).

Address reprint requests to Dr. Perouansky: Department of Anesthesiology and Critical Care, Hadassah University Hospital—Hebrew University, P.O. Box 12000 Jerusalem, 91120 Israel.





## PATCH-CLAMP STUDY OF HALOTHANE AND GLUTAMATERGIC EPSCs

(HEPES) 13,  $\text{NaH}_2\text{PO}_4$  1.25, glucose 12.5,  $\text{CaCl}_2$  1.5, and  $\text{MgSO}_4$  4 at pH 7.3. The concentration of  $\text{NaHCO}_3$  was 26.7 mM in the dissection and experimental solutions and 13 mM in the incubation solution. All experimental salines also contained bicuculline methiodide (10  $\mu\text{M}$ ) to block  $\text{GABA}_A$  receptor-mediated chloride currents, and glycine (5  $\mu\text{M}$ ) to ensure saturation of the glycine binding sites of NMDA receptors<sup>19</sup> and to increase the selectivity of 6-nitro-7-cyano-quinoline-2,3-dione (CNQX) to non-NMDA receptors.<sup>20</sup> In the experimental salines the concentration of  $\text{CaCl}_2$  was increased to 2.5 mM, whereas  $\text{MgCl}_2$  was either omitted completely or added at the specified concentrations. Saline without added  $\text{MgCl}_2$  ( $\text{Mg}^{2+}$ -free saline) contained approximately 2  $\mu\text{M}$   $\text{Mg}^{2+}$ , as measured with atomic absorption spectroscopy. DL-2-Aminophosphonovaleric acid (APV) or CNQX were added to block NMDA or non-NMDA receptor-mediated currents, respectively.<sup>21,22</sup> In one series of experiments NMDA (5  $\mu\text{M}$ ) or glutamate (10 and 20  $\mu\text{M}$ ) was applied by bath perfusion. In this series all salines contained also tetrodotoxin (1  $\mu\text{M}$ ) to block neurally evoked transmitter release.

The intracellular (pipette) solution consisted of (millimolar): CsF 130, NaCl 10, hydroxyethylpiperazineethane sulfonic acid 10, ethyleneglycol-bis-( $\beta$ -aminoethyl ether) tetraacetic acid (EGTA) 10,  $\text{MgCl}_2$ ,  $\text{CaCl}_2$  1, tetraethyl ammonium 10. The pH was adjusted to 7.2–7.3. The osmolarity was approximately 10% lower than the measured osmolarity of the extracellular solution (300–310 mOsm). The use of cesium and tetraethyl ammonium to block  $\text{K}^+$  conductances and of fluoride to reduce voltage-dependent  $\text{Ca}^{2+}$  currents, improved the space clamp. Drugs were purchased from Sigma Chemical (St. Louis, MO), with the exception of CNQX (Tocris Neuramin, Bristol, United Kingdom) and halothane (Trofield Surgical, Zug, Switzerland).

#### Application and Measurement of Halothane

The fresh  $\text{O}_2$ - $\text{CO}_2$  mixture was directed by a flowmeter through a vaporizer (Enflurtec) containing halothane. The vaporizer was calibrated for halothane with an IRIS Gas Analyzer (Draeger, Lübeck, Germany). The gas mixture of  $\text{O}_2$ - $\text{CO}_2$ -halothane was then used to bubble the experimental saline for at least 15 min before it was applied to the slice with a peristaltic pump.

Halothane concentrations in the recording chamber were measured with a gas chromatograph (Tracor 540) equipped with a 1.83-m  $\times$  0.3-cm glass column

(packed with Gaschrom 220, 80/100 mesh, Alltech), flame ionization detector, and nitrogen as the carrier gas. The temperatures of the injector, detector, and oven were 165°C, 165°C, and 155°C, respectively. Aqueous test samples (10  $\mu\text{l}$ ) were withdrawn from the recording chamber with a gas-tight syringe (Hamilton) and injected directly into the column. Peak area values from the test samples were compared with those of known concentrations of halothane standards in methanol. Column retention times for halothane and methanol were approximately 3 min and 30 s, respectively. The results of the concentration measurements are illustrated in figure 2. Standard halothane concentrations of 0.2%, 0.4%, 0.9%, 2.5%, and 5.1%, as measured with a gas analyzer (IRIS) at the exit from the vaporizer, corresponded to concentrations of  $0.37 \pm 0.01$ ,  $0.43 \pm 0.06$ ,  $0.64 \pm 0.04$ ,  $1.49 \pm 0.12$ , and  $2.79 \pm 0.24$  mM in the slice-bathing solution (mean  $\pm$  SD from two or three measurements).

#### Stimulation and Recording

Pyramidal cells in the CA1 field of the hippocampal slice were visualized at  $\times 400$  magnification with a wa-

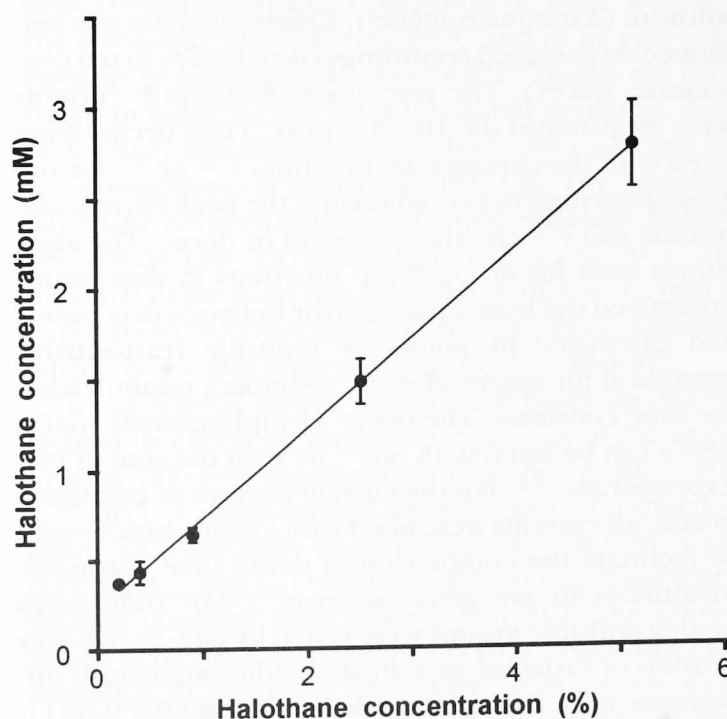

Fig. 2. Relation between the concentrations of halothane in the saline perfusing the slice chamber (millimolar) and in the gas mixture applied to the saline (percentage). Data points are mean  $\pm$  SD of measured halothane concentrations in the saline bathing the slice at each vaporizer setting. The relation between the two variables in the tested range was linear.

ter immersion objective using an upright microscope equipped with Nomarski optics (standard 14, Zeiss, Germany) (fig. 1B). Tight-seal whole-cell recordings<sup>23</sup> were obtained with recording pipettes pulled from borosilicate glass (Hilgenberg, Maisfeld, Germany) on a vertical puller (List-medical, Germany) and coated with Sylgard resin (Dow Corning Chemical, Midland, MI). The series resistance (5–10 MΩ) was compensated to 50–70% by the patch-clamp amplifier (LM-EPC 7, List-Electronic, Darmstadt, Germany). The pipettes used for cleaning and stimulating were pulled from disposable micropipettes (Boralex, Rochester Scientific) and filled with saline. The EPSCs were evoked by stimulating close (20–70 μm) to the patched cell at a frequency of 0.1 Hz, using a bipolar electrode consisting of the aforementioned cleaning pipette and a remote Ag–AgCl pellet connected by a 100-μm-thick platinum wire to an isolation unit (World Precision Instruments, Aston, England). Stimulus strength was adjusted to evoke maximal stable EPSCs.

#### Data Analysis

All currents recorded were filtered at 3 kHz, digitized on-line at sampling rates between 0.7 and 2 kHz and analyzed off-line with a personal computer and pClamp software (Axon Instruments). Kinetic analysis was performed on averaged recordings (usually five to ten consecutive traces). The rise times of synaptic currents were measured at the 10–90% peak. Their decays were fitted with the exponential function:  $y = Ae^{-t/\tau}$  for single-exponential decay, where  $A$  = the peak current amplitude and  $\tau$  = the time constant of decay. The algorithms used for fitting these functions to data points minimized the least-squares error between data points and calculated fit points by multiple least-squares regression for amplitudes and a simplex minimization for time constants. The decay of hippocampal NMDA EPSCs can be fitted with one<sup>24</sup> or with the sum of two exponentials.<sup>18,25</sup> For the current analysis of halothane effects, all currents were fitted with a single exponential to facilitate the comparison of decay time constants. Measurements are given as mean  $\pm$  SD. Differences among multiple groups were tested by one- or two-way analysis of variance, as indicated. When significant differences were indicated in the F ratio test ( $P < 0.001$ ), the significance of differences between means of any two of these groups was determined by the modified Tukey method for multiple comparisons with an  $\alpha$  of 0.05. Differences between paired sets of data were compared by using Student's  $t$  test.

The solid lines through the data points in current-voltage plots were fitted as described previously.<sup>18</sup> The dose-response curve for halothane was obtained by fitting experimental results with the Hill equation

$$I = I_m / (1 + (IC_{50}/[\text{halothane}])^n)$$

in which  $I_m$  = maximal inhibition;  $IC_{50}$  = the concentration producing 50% inhibition; and  $n$  = the Hill coefficient.

## Results

### Excitatory Postsynaptic Currents in Adult CA1 Neurons

The current results are based on recordings from 22 CA1 pyramidal cells from adult mouse hippocampi. Stimulation of afferent fibers in the vicinity of patched neurons reliably evoked stimulus-graded EPSCs. Peak amplitudes of EPSCs ( $I_{\text{peak}}$ ) evoked by supramaximal stimuli at holding voltage of  $-60$  mV varied from tens to hundreds of picoamperes in different cells. A representative example is shown in figure 3A. When evoked in standard saline (*i.e.*, containing 1 mM  $Mg^{2+}$ ) and at holding potentials negative to  $-40$  mV, the EPSCs had a relatively fast time course. The EPSC decay became progressively slower with depolarization (fig. 3A, left). Changing to  $Mg^{2+}$ -free saline also prolonged the decay of EPSCs evoked at negative holding potentials and augmented their amplitude (fig. 3A, right). This dependence on voltage and  $Mg^{2+}$  is characteristic of EPSCs mediated by admixed non-NMDA and NMDA receptors.<sup>26</sup>

To characterize more precisely the possible contribution of non-NMDA and NMDA receptors to the native EPSC, we determined the current-voltage relations of  $I_{\text{peak}}$  and of the EPSC measured 25 ms after the peak ( $I_{25}$ ) (fig. 3B). Both  $I_{\text{peak}}$  and  $I_{25}$  reversed at holding potentials close to 0 mV, as expected for glutamate receptor-mediated currents in our experimental conditions.<sup>18,24,26</sup> The relation of  $I_{\text{peak}}$  versus holding potential in standard saline was nearly linear over a large voltage range, consistent with its mediation by non-NMDA receptors. By contrast, the corresponding relation of  $I_{25}$  versus holding potential displayed a region of negative slope conductance at voltages negative to  $-30$  mV, indicating the presence of a slower NMDA receptor-mediated EPSC component. As expected, this region in the current-voltage relation was shifted to much more negative voltage upon perfusion with  $Mg^{2+}$ .

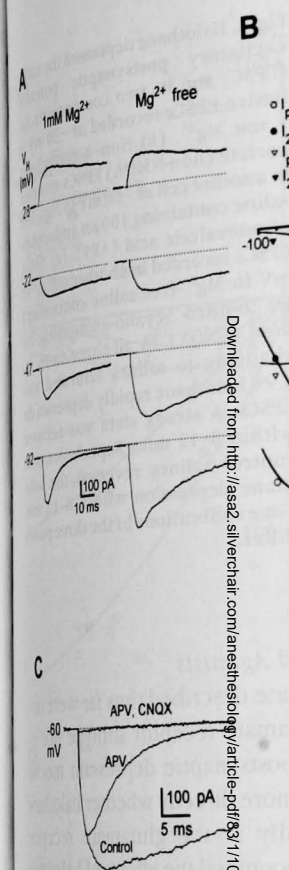

Fig. 3. Glutamatergic excitatory postsynaptic currents in adult CA1 pyramidal cells consist of native EPSCs (methyl-D-aspartate) and NMDA receptor-mediated components. (A) Exemplary native EPSCs recorded at various holding potentials ( $V_h$ ) in standard saline (1 mM  $Mg^{2+}$ ) and  $Mg^{2+}$ -free saline (A, right). In standard saline, the EPSCs recruited a slow EPSC component. The decay of the EPSCs from the experimentally determined peak EPSC amplitude ( $I_{\text{peak}}$ ) and the EPSC measured 25 ms after the peak ( $I_{25}$ ) were plotted against holding potential ( $V_h$ ) in standard saline (left) and  $Mg^{2+}$ -free saline (right). The deviation from linearity of  $I_{\text{peak}}$  and  $I_{25}$  at negative voltages suggests that NMDA receptors also in 1 mM  $Mg^{2+}$  saline (see below). (B) Current-voltage relations of the non-NMDA and NMDA receptor-mediated EPSCs recorded at  $-60$  mV in  $Mg^{2+}$ -free saline. Application of 100 μM aminophosphonovaleric acid (APV), a non-NMDA receptor antagonist, blocked a slow EPSC component. The remaining EPSC had a fast rise time and decayed within 25 ms after the peak. It was blocked by 6-nitro-7-cyano-quinoxaline-2,3-dicarboxylic acid (CNQX), an NMDA receptor antagonist. (C, right) EPSCs from an adult CA1 pyramidal cell recorded in 1 mM  $Mg^{2+}$  saline. Application of 100 μM APV completely suppressed the fast EPSC component. The remaining slow EPSC component was completely suppressed by 100 μM CNQX. The NMDA EPSC component is slow and is not blocked by APV. EPSC, it contributes substantially to the total EPSC. The two panels differ.



## PATCH-CLAMP STUDY OF HALOTHANE AND GLUTAMATERGIC EPSCs

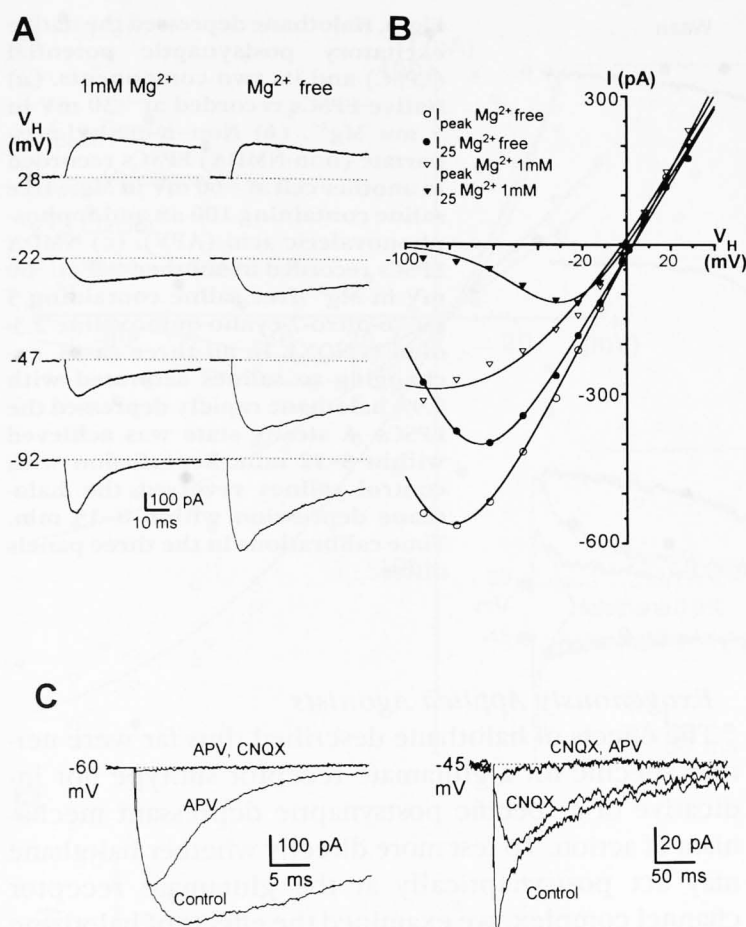

**Fig. 3.** Glutamatergic excitatory postsynaptic currents (EPSCs) in adult CA1 pyramidal cells consisted of non-NMDA (non-N-methyl-D-aspartate) and NMDA receptor-mediated components. (A) Exemplary native EPSCs recorded at various holding potentials ( $V_H$ ) in standard saline (1 mM  $Mg^{2+}$ ) (A, left) and in  $Mg^{2+}$ -free saline (A, right). In standard saline, depolarizing  $V_H$  recruited a slow EPSC component. This component was present at all  $V_H$ s in  $Mg^{2+}$ -free saline. (B) Current-voltage ( $I-V_H$ ) relation of the EPSCs from the experiment illustrated in A. The peak EPSC amplitude ( $I_{peak}$ ) and the EPSC amplitude recorded 25 ms after the peak ( $I_{25}$ ) were plotted against  $V_H$ .  $I_{25}-V_H$  in  $Mg^{2+}$  saline (closed triangles) displays an area of negative slope conductance typical for NMDA receptor-mediated currents. The deviation from linearity of  $I_{peak}-V_H$  (open triangles) at  $V_H$ s less than -30 mV suggests that NMDA EPSCs contribute to  $I_{peak}$ , also in 1 mM  $Mg^{2+}$  saline (see below). (C) Pharmacologic separation of the non-NMDA and NMDA EPSC components. (C, left) EPSCs recorded at -60 mV in  $Mg^{2+}$ -free saline. Application of 100  $\mu M$  aminophosphonovaleric acid (APV), an NMDA receptor antagonist, blocked a slow EPSC component. The remaining EPSC had a fast rise time and decayed to near baseline within 25 ms after the peak. It was blocked entirely by 5  $\mu M$  6-nitro-7-cyano-quinoline-2,3-dione (CNQX), an  $\alpha$ -amino-3-hydroxy-5-methylisoxazole-4-propionic acid-kainate receptor antagonist. (C, right) EPSCs from another cell, recorded at -45 mV in 1 mM  $Mg^{2+}$  saline. Application of 5  $\mu M$  CNQX blocked a fast EPSC component. The remaining EPSC was almost completely suppressed by 100  $\mu M$  APV. Although the rise phase of the NMDA EPSC component is slower than that of the native EPSC, it contributes substantially to  $I_{peak}$ . All sample traces are averages of five consecutive records. Calibration bars in the two panels differ.

free saline (fig. 3B). Similar dual component EPSCs were previously described in hippocampal slices from juvenile rats.<sup>18,24,26</sup>

The non-NMDA and the NMDA EPSC components could be separated pharmacologically by using receptor subtype-specific antagonists. Blocking NMDA receptors with 100  $\mu M$  APV isolated the fast non-NMDA EPSC, which was suppressed completely by addition of 5  $\mu M$  CNQX (fig. 3C, left). Conversely, adding 5  $\mu M$  CNQX to block non-NMDA receptors isolated the slow NMDA EPSC, which was abolished completely by addition of 100  $\mu M$  APV (Fig. 3C, right).

As previously shown in juvenile rat hippocampal neurons,<sup>18,24,26</sup> the isolated non-NMDA EPSCs in adult mouse pyramidal cells were much faster than the NMDA EPSCs. The rise time and decay time constant of the former at -60 mV holding potential were  $1.0 \pm 0.4$  and  $7.4 \pm 0.9$  ms (mean  $\pm$  SD;  $n = 6$ ), respectively. By contrast, the rise time and decay time constant of the latter were  $11.3 \pm 3.9$  and  $198 \pm 37$  ms ( $n = 5$ ), respectively.

#### Effects of Halothane on Excitatory Postsynaptic Currents

Having characterized the receptor subtypes mediating EPSCs in adult mouse CA1 pyramidal neurons, we tested the sensitivity of the native EPSC and of its two components to halothane. Representative results are illustrated in figure 4. At -30 mV holding potential, 0.9% (0.64 mM) halothane reduced both the early and the late components of the native EPSC (fig. 4A). Likewise, halothane reduced both the pharmacologically isolated non-NMDA (fig. 4B) and NMDA EPSCs (fig. 4C). The maximal depression was achieved within 8–12 min of exposure to halothane and recovered nearly completely within 8–12 min after terminating the exposure.

To characterize further the action of halothane, we examined its effects on the two components of the native EPSC at different holding membrane potentials (-90 to +30 mV). A representative experiment is illustrated in figure 5A. Halothane (0.9%) blocked both EPSC components ( $I_{peak}$  and  $I_{25}$ ) over the whole voltage range tested without changing their reversal potential. The pooled results of four similar experiments (0.9% halothane) are described in figure 5B. Both EPSC components were equally depressed by halothane in a voltage independent manner across the entire voltage range tested.

#### Dose-Response Relation

To test whether halothane preferentially affects one subtype of glutamate receptors, we compared the de-

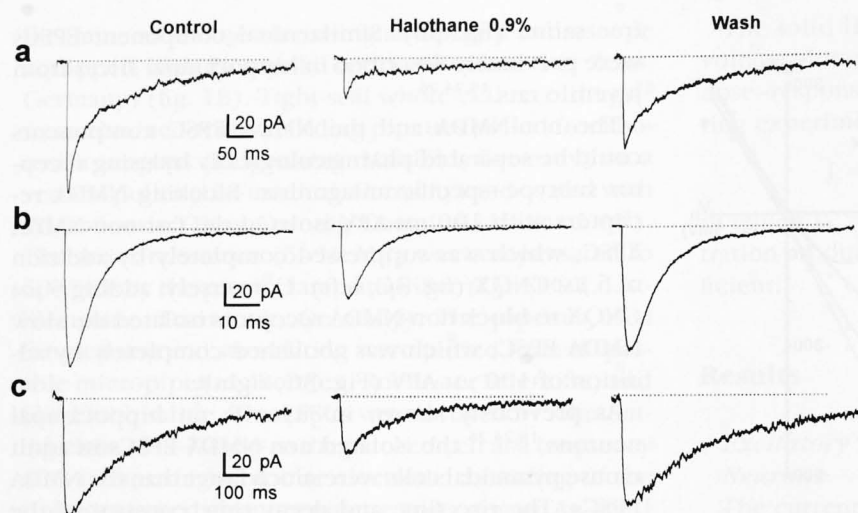

Fig. 4. Halothane depressed the native excitatory postsynaptic potential (EPSC) and its two components. (a) Native EPSCs recorded at -30 mV in 1 mM Mg<sup>2+</sup>. (b) Non-n-methyl-D-aspartate (non-NMDA) EPSCs recorded in another cell at -60 mV in Mg<sup>2+</sup>-free saline containing 100 μM aminophosphonovaleric acid (APV). (c) NMDA EPSCs recorded in another cell at -60 mV in Mg<sup>2+</sup>-free saline containing 5 μM 6-nitro-7-cyano-quinoline-2,3-dione (CNQX). In all three cases, exchanging to salines saturated with 0.9% halothane rapidly depressed the EPSCs. A steady state was achieved within 8–12 min. Reperfusion with control salines reversed the halothane depression within 8–15 min. Time calibrations in the three panels differ.

pressant action of several halothane concentrations on pharmacologically isolated non-NMDA and NMDA EPSCs. The results obtained from 15 pyramidal cells are summarized in figure 6. We could not detect a significant difference in the depression of non-NMDA *versus* NMDA EPSCs (two-way analysis of variance). At the lowest halothane concentration applicable with our vaporizer (0.2%, 0.37 mM), the non-NMDA and NMDA EPSCs were depressed by  $24 \pm 8\%$  and  $18 \pm 6\%$ , respectively ( $n = 3$  for each EPSC type). Higher halothane doses caused more EPSC depression, with the highest concentration tested (5.1%, 2.79 mM) causing almost a complete suppression of both EPSCs ( $97 \pm 4\%$  and  $97 \pm 5\%$ ;  $n = 4$  and  $n = 5$ , respectively). The IC<sub>50</sub> values, interpolated from the fitted dose-response curves, were 0.69% (0.57 mM) and 0.87% (0.66 mM) for the NMDA and non-NMDA EPSCs, respectively (fig. 6).

#### Kinetics of Excitatory Postsynaptic Currents

We next examined the effects of halothane on the time course of isolated non-NMDA and NMDA EPSCs evoked at -60 mV holding potential. These measurements were not executed on data obtained with high halothane concentrations, because the marked depression of the EPSCs rendered them unreliable. The pooled results are shown in figure 7. At the three concentrations tested (0.4%, 0.9%, and 2.5%), halothane had no effect on the rise times, and halothane in concentrations to 0.9% did not significantly affect the decay time constants of isolated EPSCs.

#### Exogenously Applied Agonists

The effects of halothane described thus far were neither specific for a glutamate receptor subtype nor indicative of a specific postsynaptic depressant mechanism of action. To test more directly whether halothane may act postsynaptically at the glutamate receptor channel complex, we examined the effects of halothane on currents evoked by bath-applied glutamatergic agonists. Representative results from a series of six experiments are illustrated in figure 8. The salines contained 1 μM tetrodotoxin to block neurally evoked transmitter release from nerve terminals. At -60 mV holding potential, application of 5 μM NMDA induced a large inward current (fig. 8A). Halothane in concentrations to 5.1% (shown above to depress the EPSCs almost completely) did not depress the NMDA-induced currents (figs. 8B and 8C). These currents were entirely depressed by 400 μM APV (data not shown).

In two additional experiments we similarly tested the effects of halothane on currents evoked by bath-applied glutamate (10 and 20 μM). Halothane (5.1%) had no effects on these currents, which could be entirely abolished by the concomitant administration of APV and CNQX (400 and 10 μM, respectively; data not shown).

#### Discussion

The main finding of this study is that halothane suppresses glutamate receptor-mediated EPSCs in adult hippocampal pyramidal cells in a dose-dependent manner. Both non-NMDA and NMDA EPSCs are revers-

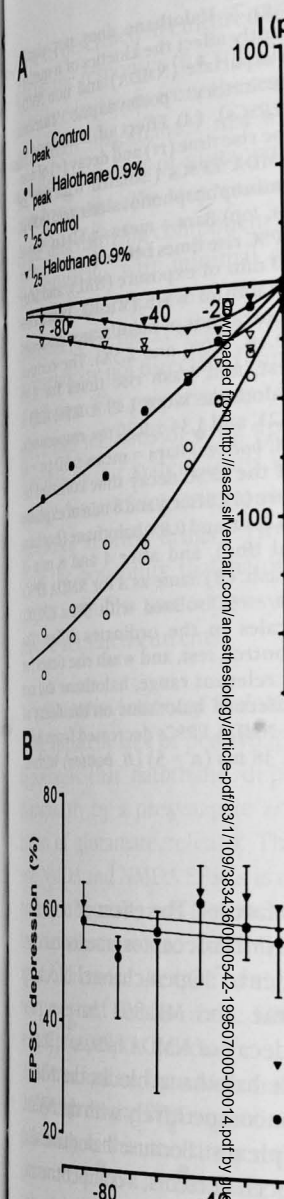

Fig. 5. Halothane-induced depression of EPSCs. (A) Relations of peak EPSC amplitude recorded 25 ms after the onset of the EPSC versus holding potential (V<sub>h</sub>) in 1 mM Mg<sup>2+</sup> after equilibration with 0.9% halothane. (B) Relations of peak EPSC amplitude recorded 25 ms after equilibration with 0.9% halothane versus V<sub>h</sub>. (Inset) Exemplary EPSCs recorded in control and in 0.9% halothane saline. I<sub>peak</sub> (circles; mostly non-n-methyl-D-aspartate component) and I<sub>25</sub> (triangles; NMDA component) were depressed across the range of V<sub>h</sub>. Data points are means ± SEM from four experiments. The reversal potential was not analyzed. The slopes of the lines were -0.03 for non-NMDA and NMDA components. Halothane blocks both EPSC components in a dose-dependent manner.

## PATCH-CLAMP STUDY OF HALOTHANE AND GLUTAMATERGIC EPSCs

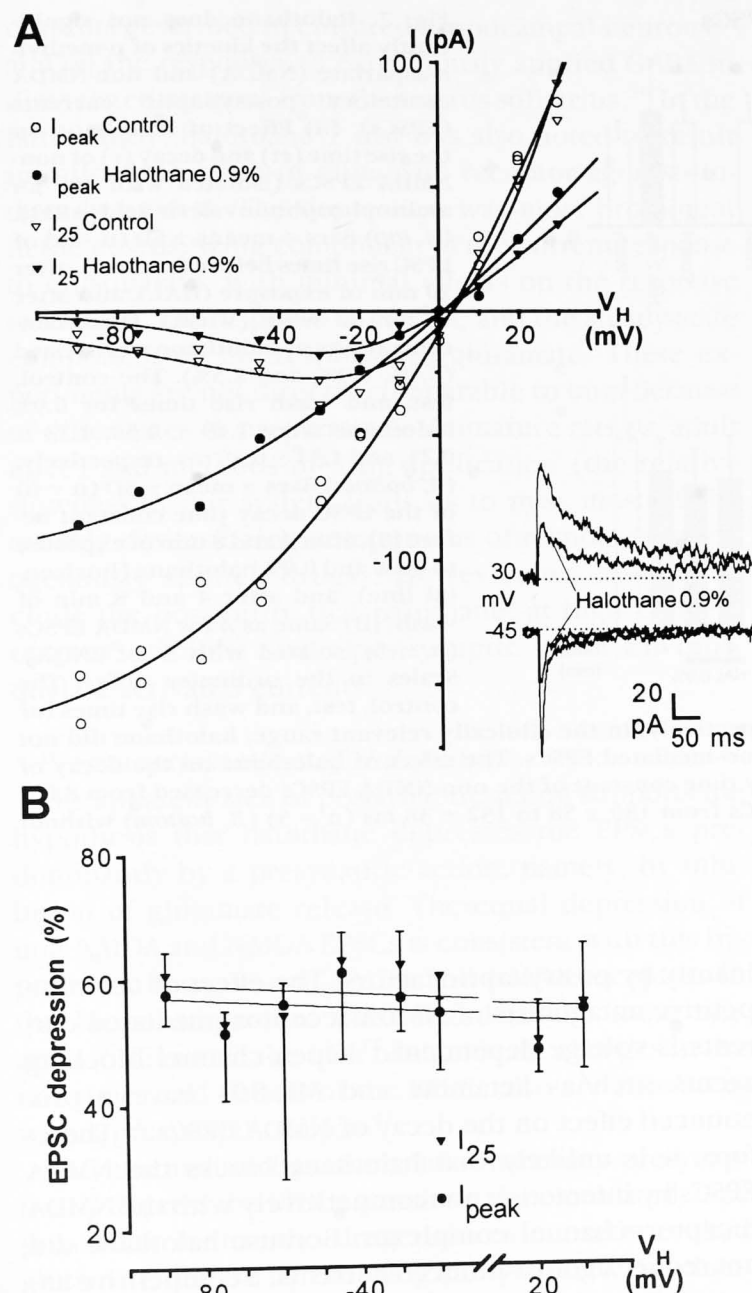

Fig. 5. Halothane-induced depression of excitatory postsynaptic potentials (EPSCs) was independent of membrane voltage. (A) Relations of peak EPSC amplitude ( $I_{peak}$ ) and EPSC amplitude recorded 25 ms after the peak ( $I_{25}$ ) of native EPSCs versus holding potential ( $V_H$ ) in 1 mM  $Mg^{2+}$  saline before and after equilibration with 0.9% halothane. Both current components were depressed across the entire voltage range (-90 to +30 mV). Voltage dependence of the block was not evident. (A, Inset) Exemplary EPSCs recorded at the indicated  $V_H$  in control and in 0.9% halothane saline. (B) Percentage block of  $I_{peak}$  (circles; mostly non-n-methyl-D-aspartate [non-NMDA] component) and  $I_{25}$  (triangles; NMDA component) by 0.9% halothane at various  $V_H$ s. Data points represent the pooled results from four experiments (mean  $\pm$  SD). EPSCs close to the reversal potential were not analyzed because of their small amplitudes. The slopes of the linear regression lines were -0.03 for non-NMDA and NMDA components, suggesting that halothane blocks both EPSC components in a voltage-independent manner.

ibly depressed by halothane in a voltage-independent manner, whereas agonist-induced currents are not affected.

#### Depression of Glutamatergic Excitatory Postsynaptic Currents

Several previous studies using extra- and intracellular recording techniques have demonstrated that anesthetic doses of halothane depress fast synaptic transmission in mammalian CNS preparations *in vitro*.<sup>9-11,14</sup> Our data suggest that this effect of halothane can be accounted for by a direct depression of the non-NMDA EPSC, which constitutes the predominant EPSC component during fast synaptic transmission in most CNS excitatory synapses.<sup>15</sup>

Halothane depressed the amplitudes of non-NMDA and NMDA EPSCs equally well. In this respect halothane

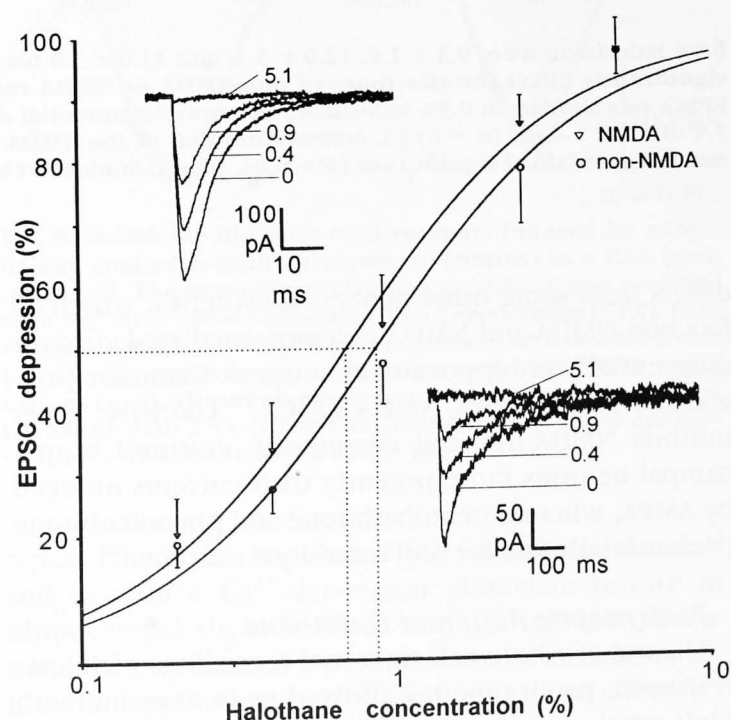

Fig. 6. Dose-response relation of halothane-induced depression of excitatory postsynaptic currents (EPSCs). The dose-response curves summarize the results from 15 pyramidal cells clamped at -60 mV in  $Mg^{2+}$ -free saline. Each cell was exposed to several concentrations of halothane. Non-n-methyl-D-aspartate (non-NMDA) and NMDA EPSCs were pharmacologically isolated with aminophosphonovaleric acid (APV) (100  $\mu$ M) and 6-nitro-7-cyano-quinoxaline-2,3-dione (CNQX) (5  $\mu$ M), respectively. Solid lines = lines fitted through the data points; dotted lines = concentrations producing 50% inhibition ( $IC_{50}$ ): 0.87% (0.66 mM) for non-NMDA EPSCs and 0.69% (0.57 mM) for NMDA EPSCs. (Insets) Exemplary non-NMDA (inset, top left) and NMDA (inset, bottom right) EPSCs exposed to the indicated halothane concentrations. Sample records are averages of five consecutive traces.







currents described in cultured hippocampal neurons<sup>35</sup> and on the responses to exogenously applied GABA in dissociated neurons from the tractus solitarius.<sup>36</sup> In the latter study, halothane 1 mM was also noted to result in mild depression of glutamate receptor agonist-induced currents. The depression was most prominent in the desensitizing component of the current response to quisqualate, with minimal effects on the response to kainate, the response to NMDA, and the steady-state component of the response to glutamate. These experiments are not directly comparable to ours because of differences in preparations (immature rats *vs.* adult mice) and methods of drug application (the relative slowness of our system leads us to miss most of the quickly desensitizing components of responses to exogenously applied drugs). However, we cannot exclude the possibility that halothane, at high concentrations, exhibits some postsynaptic effect on quisqualate-activated currents.

#### Presynaptic Action of Halothane

The apparent lack of postsynaptic action supports the hypothesis that halothane depresses the EPSCs predominantly by a presynaptic action, namely, by inhibition of glutamate release. The equal depression of non-NMDA and NMDA EPSCs is consistent with this hypothesis, because non-NMDA and NMDA receptors in the hippocampus are colocalized to the same synapses.<sup>37</sup> Likewise the lack of significant changes in the rise times and decays of the EPSCs also are consistent with a presynaptic action.<sup>31</sup>

The mechanism by which halothane may presynaptically depress the EPSCs remains to be elucidated. One possibility is that the drug reduces neurally evoked glutamate release by blocking presynaptic  $\text{Ca}^{2+}$  channels. Halothane depressed  $\text{Ca}^{2+}$  currents and  $\text{Ca}^{2+}$ -dependent prolactin release in pituitary cells with an  $\text{IC}_{50}$  of 0.8 mM<sup>38</sup> and 0.4 mM,<sup>39</sup> respectively. Catecholamine release in pheochromocytoma cells also was inhibited by halothane with an  $\text{IC}_{50}$  of 0.7 mM.<sup>40</sup> These  $\text{IC}_{50}$  values, determined in different preparations under widely varying experimental conditions, are similar to the  $\text{IC}_{50}$  values reported here (0.57–0.66 mM) and may indicate common mechanisms of action. In support of this notion, halothane has been shown to block  $\text{Ca}^{2+}$  currents in cortical neurons.<sup>41</sup> However, the relevance of these currents to transmitter release is unclear. Isoflurane, on the other hand, has been shown to block multiple subtypes of voltage-gated  $\text{Ca}^{2+}$  currents in hippocampal pyramidal neurons,<sup>42</sup> including the N and the P sub-

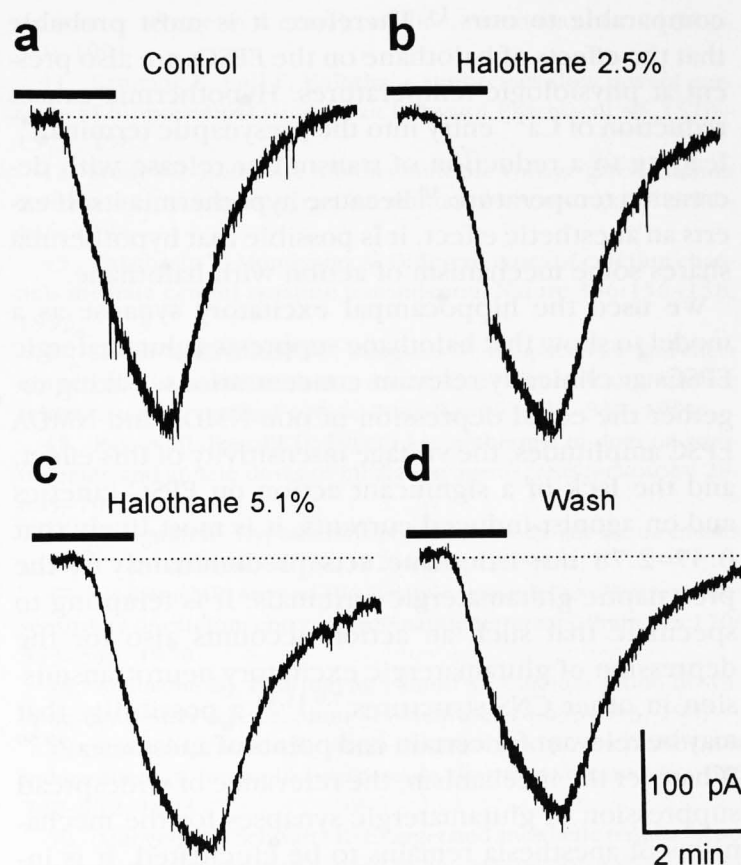

Fig. 8. Halothane did not affect currents induced by exogenously applied n-methyl-D-aspartate (NMDA) in a CA1 pyramidal cell. The neuron was clamped at  $-60$  mV and perfused with  $\text{Mg}^{2+}$ -free saline containing  $1 \mu\text{M}$  tetrodotoxin (TTX). Bath application of  $5 \mu\text{M}$  NMDA for 2 min evoked an inward current (a). Similar currents were evoked by repeated NMDA applications (b–d). These currents were not reduced by saturating the saline with 2.5% (b) or 5.1% halothane (c). These concentrations reduced the EPSCs by 85–100%.

types, which are implicated in transmitter release,<sup>43</sup> and to reduce  $\text{Ca}^{2+}$ -dependent glutamate release in hippocampal slices.<sup>44</sup> These findings indicate neurotransmitter release as a potential site of anesthetic action. In conjunction with its aforementioned effects on NMDA receptor-operated channels,<sup>34</sup> these observations indicate that isoflurane may act by both pre- and postsynaptic mechanisms.

#### Relevance to Clinical Action of Halothane

We performed the experiments at hypothermic temperatures ( $21$ – $23^\circ\text{C}$ ) only slightly greater than those that in higher mammals seem to reduce anesthetic requirements to zero ( $18$ – $20^\circ\text{C}$ ).<sup>45,46</sup> However, other workers have shown that halothane inhibits excitatory neurotransmission in preparations kept close to normal body temperature<sup>7,9,10,14</sup> at free aqueous concentrations

comparable to ours.<sup>14</sup> Therefore it is most probable that the effects of halothane on the EPSCs are also present at physiologic temperatures. Hypothermia causes reduction of  $\text{Ca}^{2+}$  entry into the presynaptic terminal,<sup>47</sup> leading to a reduction of transmitter release with decreasing temperature.<sup>48</sup> Because hypothermia itself exerts an anesthetic effect, it is possible that hypothermia shares some mechanism of action with halothane.

We used the hippocampal excitatory synapse as a model to show that halothane suppresses glutamatergic EPSCs at clinically relevant concentrations. Taking together the equal depression of non-NMDA and NMDA EPSC amplitudes, the voltage insensitivity of this effect, and the lack of a significant action on EPSC kinetics and on agonist-induced currents, it is most likely that 0.37–2.78 mM halothane acts predominantly at the presynaptic glutamatergic terminals. It is tempting to speculate that such an action accounts also for the depression of glutamatergic excitatory neurotransmission in other CNS structures,<sup>7,9,11,13</sup> a possibility that may be relevant for certain end points of anesthesia.<sup>49,50</sup> Whatever the mechanism, the relevance of widespread suppression of glutamatergic synapses for the mechanisms of anesthesia remains to be elucidated. It is interesting, however, that the anesthetic effect of halothane *in vivo* is potentiated by drugs known to be antagonists of NMDA<sup>51</sup> and non-NMDA<sup>52</sup> receptors.

The authors gratefully acknowledge the technical assistance of Yonit Viner.

## References

- Pocock G, Richards CD: Excitatory and inhibitory synaptic mechanisms in anaesthesia. *Br J Anaesth* 71:134–147, 1993
- Franks NP, Lieb WR: Selective actions of volatile general anaesthetics at molecular and cellular levels. *Br J Anaesth* 71:65–76, 1993
- Franks NP, Lieb WR: Molecular and cellular mechanisms of general anaesthesia. *Nature* 367:607–614, 1994
- Tanelian DL, Kosek P, Mody I, MacIver MB: The role of GABA<sub>A</sub> receptor/chloride channel complex in anesthesia. *ANESTHESIOLOGY* 78:757–776, 1993
- Kress HG, Tas PWL: Effects of volatile anaesthetics on second messenger  $\text{Ca}^{2+}$  in neurones and non-muscular cells. *Br J Anaesth* 71:47–58, 1993
- Morris ME: Facilitation of synaptic transmission by general anaesthetics. *J Physiol (Lond)* 284:307–325, 1978
- Kullman DM, Martin RL, Redman SJ: Reduction by general anaesthetics of group 1a excitatory postsynaptic potentials and currents in the cat spinal cord. *J Physiol (Lond)* 412:277–296, 1989
- Pearce RA, Stringer JL, Lothman EW: Effect of volatile anaesthetics on synaptic transmission in the rat hippocampus. *ANESTHESIOLOGY* 71:591–598, 1989
- Richards CD: On the mechanism of halothane anaesthesia. *J Physiol (Lond)* 233:439–456, 1973
- Richards CD, White AE: The actions of volatile anaesthetics on synaptic transmission in the dentate gyrus. *J Physiol (Lond)* 252:241–257, 1975
- Takenoshita M, Takahashi T: Mechanisms of halothane action on synaptic transmission in motoneurons of the newborn rat spinal cord *in vitro*. *Brain Res* 402:303–310, 1987
- Nicoll RA: The effects of anaesthetics on synaptic excitation and inhibition in the olfactory bulb. *J Physiol (Lond)* 223:803–814, 1972
- Yoshimura M, Higashi H, Fujita S, Shimoji K: Selective depression of hippocampal inhibitory postsynaptic potentials and spontaneous firing by volatile anaesthetics. *Brain Res* 340:363–368, 1985
- MacIver MB, Roth SH: Inhalation anaesthetics exhibit pathway-specific and differential actions on hippocampal synaptic responses *in vitro*. *Br J Anaesth* 60:680–691, 1988
- Collingridge GL, Lester RAJ: Excitatory amino acid receptors in the vertebrate central nervous system. *Pharmacol Rev* 40:143–210, 1989
- Miller RJ: Metabotropic glutamate excitatory amino acid receptors reveal their true colors. *Trends Pharmacol Sci* 12:365–367, 1991
- Edwards FA, Konnerth A, Sakmann B, Takahashi T: A thin slice preparation for patch clamp recordings from neurones of the mammalian central nervous system. *Pflügers Arch* 414:600–612, 1989
- Perouansky M, Yaari Y: Kinetic properties of NMDA receptor-mediated synaptic currents in rat hippocampal pyramidal cells versus interneurons. *J Physiol (Lond)* 465:223–244, 1993
- Thomson AM, Walker VE, Flynn DM: Glycine enhances NMDA receptor-mediated synaptic potentials in neocortical slices. *Nature* 338:422–424, 1989
- Birch PJ, Grossmann CJ, Hayes AG: 6,7-Dinitro-quinolaxaline-2,3-dione and 6-nitro-7-cyano-quinolaxaline-2,3-dione antagonise responses to NMDA in the rat spinal cord via an action at the strychnine-insensitive glycine receptor. *Eur J Pharmacol* 56:177–180, 1988
- Blake JF, Brown MW, Collingridge GL: CNQX blocks acidic amino acid induced depolarizations and synaptic components mediated by non-NMDA receptors in rat hippocampal slices. *Neurosci Lett* 89:182–186, 1988
- Honore T, Davies SN, Drejer J, Fletcher EJ, Jacobsen P, Lodge D, Nielsen FE: Quinoxalinediones: Potent competitive non-NMDA glutamate receptor antagonists. *Science* 241:701–703, 1988
- Hamill OP, Marty A, Neher E, Sakmann B, Sigworth FJ: Improved patch-clamp techniques for high-resolution current recording from cells and cell-free membrane patches. *Pflügers Arch* 391:85–100, 1981
- Hestrin S, Nicoll RA, Perkel DJ, Sah P: Analysis of excitatory synaptic action in pyramidal cells using whole-cell recording from rat hippocampal slices. *J Physiol (Lond)* 422:203–225, 1990
- Konnerth A, Keller BU, Ballanyi K, Yaari Y: Voltage sensitivity of NMDA-receptor mediated postsynaptic currents. *Exp Brain Res* 81:209–212, 1990
- Keller BU, Konnerth A, Yaari Y: Patch clamp analysis of excitatory synaptic currents in granule cells of rat hippocampus. *J Physiol (Lond)* 435:275–293, 1991
- Kemp JA, Foster AC, Wong EHF: Non-competitive antagonists of excitatory amino acid receptors. *Trends Neurosci* 10:294–298, 1987
- Weight FF, Lovinger DM, White C: The actions of volatile anaesthetics on excitatory amino acid receptors in the rat hippocampus. *Ann N Y Acad Sci* 625:97–107, 1991
- Colquhoun D, Jonas P, Sakmann B: The actions of glutamate on AMPA/kainate receptors in rat hippocampal slices. *J Physiol (Lond)* 445:251–271, 1991
- Lester RAJ, Clements JD, Westbrook GL: The time course of NMDA receptor currents in rat hippocampal slices. *Nature* 346:565–567, 1990
- Hestrin S, Sah P, Nicoll RA: Mechanisms of action of anaesthetics on dual component excitatory synaptic currents in rat hippocampal slices. *Neuron* 5:217–225, 1990
- Richards CD, Smajc JC: Anaesthetic actions on glutamate receptors in neocortex. *Br J Pharmacol* 101:101–109, 1990
- Pail E, El Beheiry H: Anaesthetic actions in neocortex. *Br J Pharmacol* 101:101–109, 1990
- Yang J, Zorumski CF: Effects of anaesthetics on glutamate-gated ion channels in cultured rat hippocampal slices. *Ann N Y Acad Sci* 625:287–289, 1991
- Jones MV, Harrison NL: Effects of anaesthetics on inhibitory postsynaptic currents in rat hippocampal neurones. *J Neurophysiol* 70:13–21, 1993
- Wakamori M, Ikemoto Y, Akaishi T: Effects of anaesthetics and a volatile convulsant on excitatory amino acid responses in dissociated cerebellar granule cells. *J Neurophysiol* 66:2014–2021, 1991
- Bekkers JM, Stevens CF: NMDA and non-NMDA receptors are co-localized at individual excitatory synapses in rat hippocampus. *Nature* 341:230–233, 1989
- Herrington J, Stern RC, Evans AS: The effects of anaesthetics on two components of calcium current in rat hippocampal neurones. *J Neurosci* 11:2226–2240, 1991
- Stern RC, Herrington J, Little CJ: The effects of anaesthetics on stimulus-secretion coupling in rat hippocampal neurones. *J Neurosci* 11:2217–2225, 1991
- Kress HG, Müller J, Eisen A, Gahleitner A: Effects of volatile anaesthetics on cytochrome P-450 2C19 gene expression in rat liver. *Br J Anaesth* 71:1000–1004, 1993



## PATCH-CLAMP STUDY OF HALOTHANE AND GLUTAMATERGIC EPSCs

28. Weight FF, Lovinger DM, White G, Peoples RW: Alcohol and anesthetic actions on excitatory amino acid-activated ion channels. *Ann N Y Acad Sci* 625:97-107, 1991
29. Colquhoun D, Jonas P, Sakmann B: Action of brief pulses of glutamate on AMPA/kainate receptors in patches from different neurones of rat hippocampal slices. *J Physiol (Lond)* 458:261-287, 1992
30. Lester RAJ, Clements JD, Westbrook GL, Jahr CE: Channel kinetics determine the time course of NMDA receptor-mediated synaptic currents. *Nature* 346:565-567, 1990
31. Hestrin S, Sah P, Nicoll RA: Mechanisms generating the time course of dual component excitatory synaptic currents recorded in hippocampal slices. *Neuron* 5:247-253, 1990
32. Richards CD, Smaje JC: Anaesthetics depress the sensitivity of cortical neurones to glutamate. *Br J Pharmacol* 58:347-357, 1976
33. Puil E, El Beheiry H: Anaesthetic suppression of transmitter actions in neocortex. *Br J Pharmacol* 101:61-66, 1990
34. Yang J, Zorumski CF: Effects of isoflurane on N-methyl-D-aspartate gated ion channels in cultured rat hippocampal neurons. *Ann N Y Acad Sci* 625:287-289, 1991
35. Jones MV, Harrison NL: Effects of volatile anaesthetics on the kinetics of inhibitory postsynaptic currents in cultured rat hippocampal neurons. *J Neurophysiol* 70:1339-1349, 1993
36. Wakamori M, Ikemoto Y, Akaike N: Effects of two volatile anesthetics and a volatile convulsant on the excitatory and inhibitory amino acid responses in dissociated CNS neurons of the rat. *J Neurophysiol* 66:2014-2021, 1991
37. Bekkers JM, Stevens CF: NMDA and non-NMDA receptors are co-localized at individual excitatory synapses in cultured rat hippocampus. *Nature* 341:230-233, 1989
38. Herrington J, Stern RC, Evers AS, Lingle CJ: Halothane inhibits two components of calcium current in clonal (GH<sub>3</sub>) pituitary cells. *J Neurosci* 11:2226-2240, 1991
39. Stern RC, Herrington J, Lingle CJ, Evers AS: The action of halothane on stimulus-secretion coupling in clonal (GH<sub>3</sub>) pituitary cells. *J Neurosci* 11:2217-2225, 1991
40. Kress HG, Müller J, Eisert A, Gilge U, Tas PW, Koschel K: Effects of volatile anaesthetics on cytoplasmic Ca<sup>2+</sup> signaling and transmitter release in a neural cell line. *ANESTHESIOLOGY* 74:309-319, 1991
41. Krnjevic K, Puil E: Halothane suppresses slow inward currents in hippocampal slices. *Can J Physiol Pharmacol* 66:1570-1575, 1988
42. Study RE: Isoflurane inhibits multiple voltage-gated calcium currents in hippocampal pyramidal neurons. *ANESTHESIOLOGY* 81:104-116, 1994
43. Takahashi T, Momiyama A: Different types of calcium channels mediate central synaptic transmission. *Nature* 366:156-158, 1993
44. Larsen M, Grondahl TO, Haugstad TS, Langmoen IA: The effect of the volatile anesthetic isoflurane on Ca<sup>2+</sup>-dependent glutamate release from rat cerebral cortex. *Brain Res* 663:335-337, 1994
45. Regan MJ, Eger EI II: Effect of hypothermia in dogs on anesthetizing and apneic doses of inhalation agents. *ANESTHESIOLOGY* 28:689-700, 1967
46. Antognini JF: Hypothermia eliminates isoflurane requirements at 20° C. *ANESTHESIOLOGY* 78:1152-1156, 1993
47. Charlton MP, Atwood HL: Synaptic transmission: Temperature-sensitivity of calcium entry in presynaptic terminals. *Brain Res* 170:543-546, 1979
48. Augustine GJ, Charlton MP, Smith SS: Calcium action in synaptic transmitter release. *Annu Rev Neurosci* 10:633-693, 1987
49. Rampil IJ, Mason P, Singh H: Anesthetic potency (MAC) is independent of forebrain structures in the rat. *ANESTHESIOLOGY* 78:707-712, 1993
50. Antognini JF, Schwartz K: Exaggerated anesthetic requirements in the preferentially anesthetized brain. *ANESTHESIOLOGY* 79:1244-1249, 1993
51. Scheller M, Zornow M, Fleischer J, Shearman G, Greber T: The non-competitive N-methyl-D-aspartate receptor antagonist, MK-801 profoundly reduces volatile anesthetic requirements in rabbits. *Neuropharmacology* 28:677-681, 1989
52. McFarlane C, Warner DS, Todd MM, Nordholm L: AMPA receptor competitive antagonism reduces halothane MAC in rats. *ANESTHESIOLOGY* 77:1165-1170, 1992
